# Supplementary material for: Ionic liquids as porogens for molecularly imprinted polymers: propranolol, a model study
Source: Royal Society of Chemistry journal article supplement (doi:10.1039/c4ob00547c), 2014-01-01
Supplement: c4ob00547c1.pdf [file c4ob00547c1.pdf]

## **Ionic Liquids as Porogens for Molecularly Imprinted Polymers: Propranolol, a Model Study**

**Katherine Booker,<sup>a</sup> Clovia I Holdsworth,<sup>a</sup> Cara M Doherty,<sup>b</sup> Anita J Hill,<sup>b</sup> Michael C Bowyer <sup>c</sup> and Adam McCluskey<sup>a\*</sup>**

Electronic Supporting Information

1. Molecular modelling images of the interactions between the pre-polymerisation cluster components.
2. NMR chemical shift and chemical shift changes on addition of equivalents of the functional monomer (MAA)
3. Plot of chemical shift changes as a function of equivalents of MAA added.
4. Scatchard binding data for 1-MIPs prepared in VOC and [BMIM][PF<sub>6</sub>]
5. TGA and DSC analysis of polymer stability.

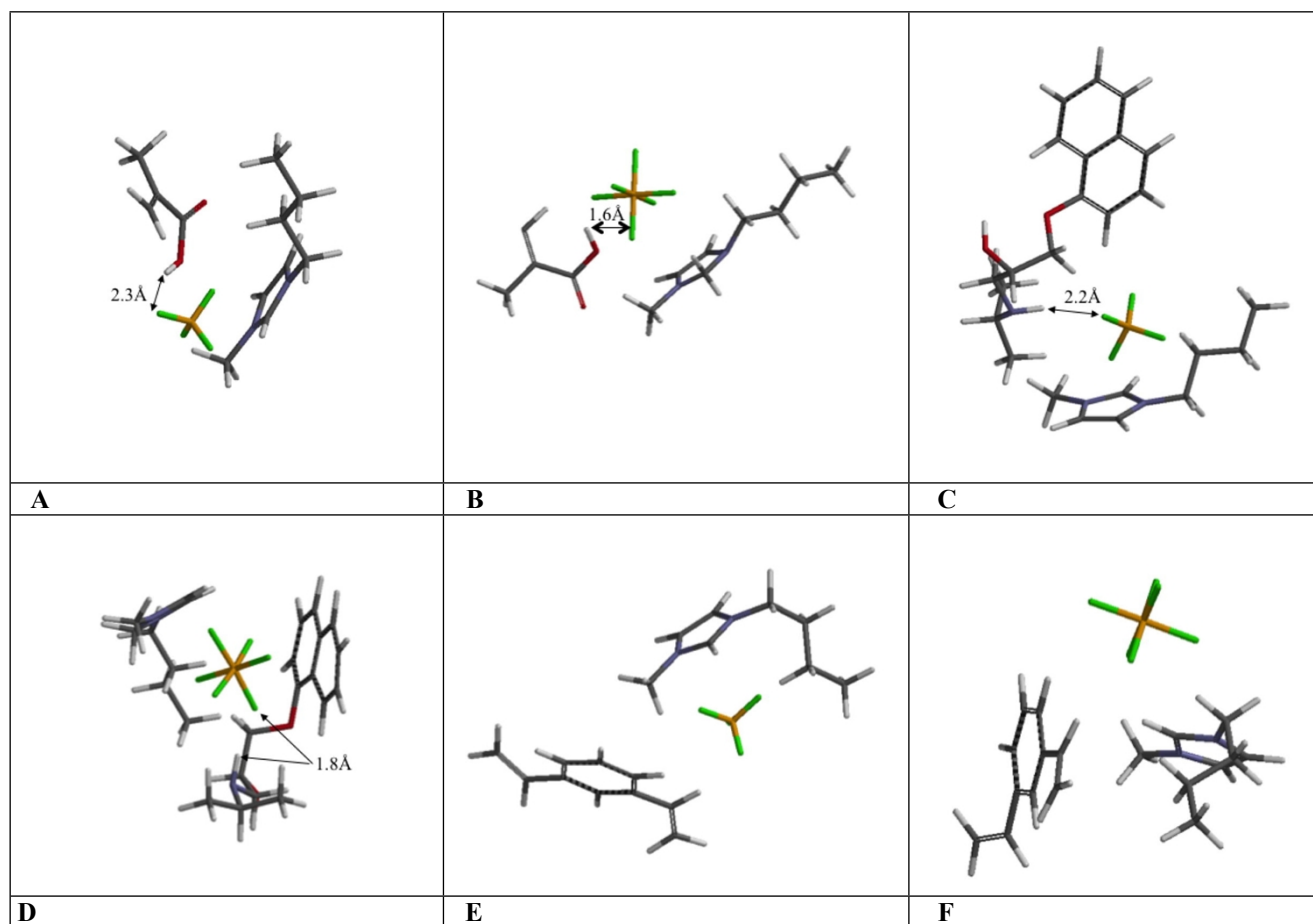

Figure S1. Energy minimised molecular modelling images of the interaction of (A) [BMIM][BF<sub>4</sub>] and MAA; (B) [BMIM][PF<sub>6</sub>] and MAA; (C) **1** and [BMIM][BF<sub>4</sub>]; (D) **1** and [BMIM][PF<sub>6</sub>]; (E) Modelling image of DVB and [BMIM][BF<sub>4</sub>]; and (F) DVB and [BMIM][PF<sub>6</sub>].

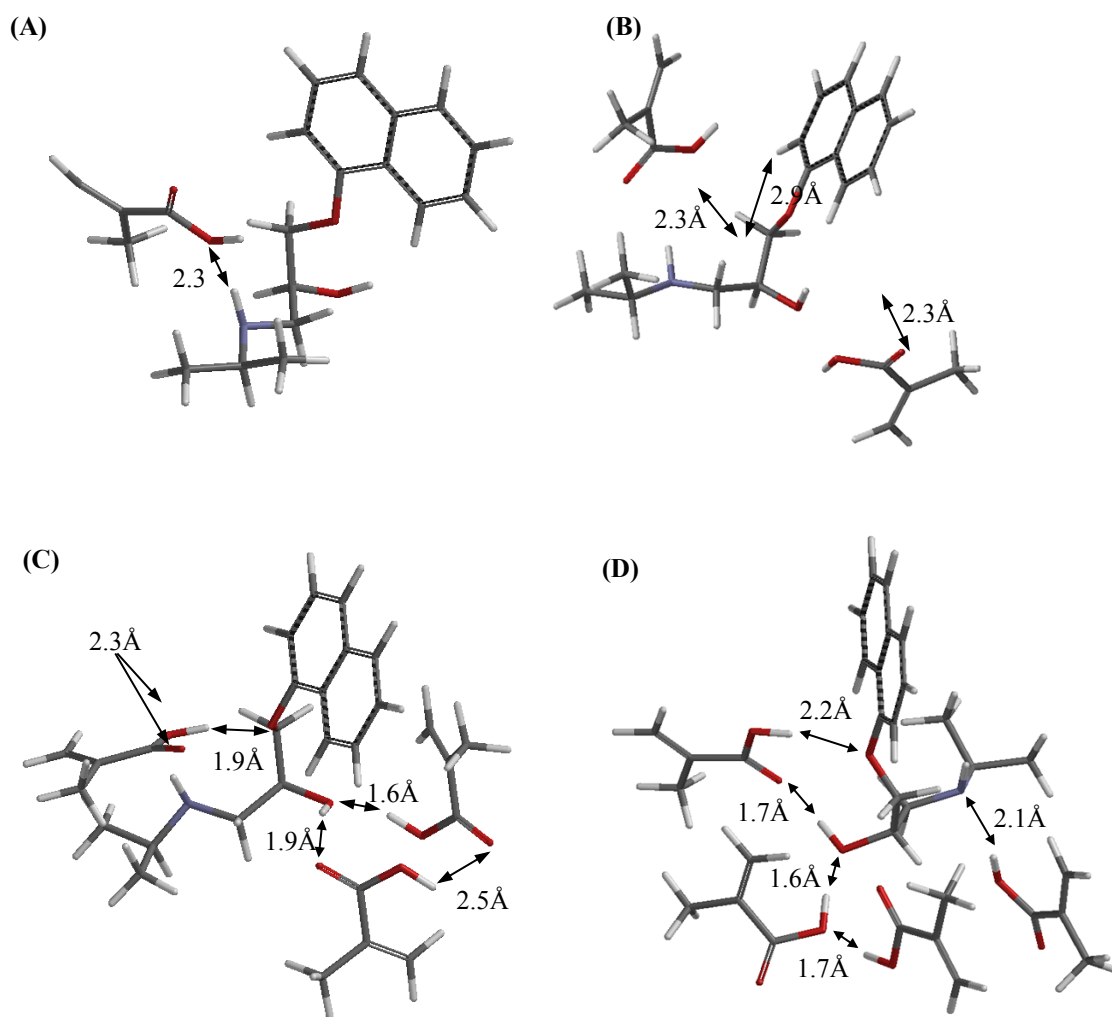

**Figure S2** Modelling images of MAA and **1**. Template : monomer ratios of (A) 1:1, (B) 1:2, (C) 1:3 and (D) 1:4.

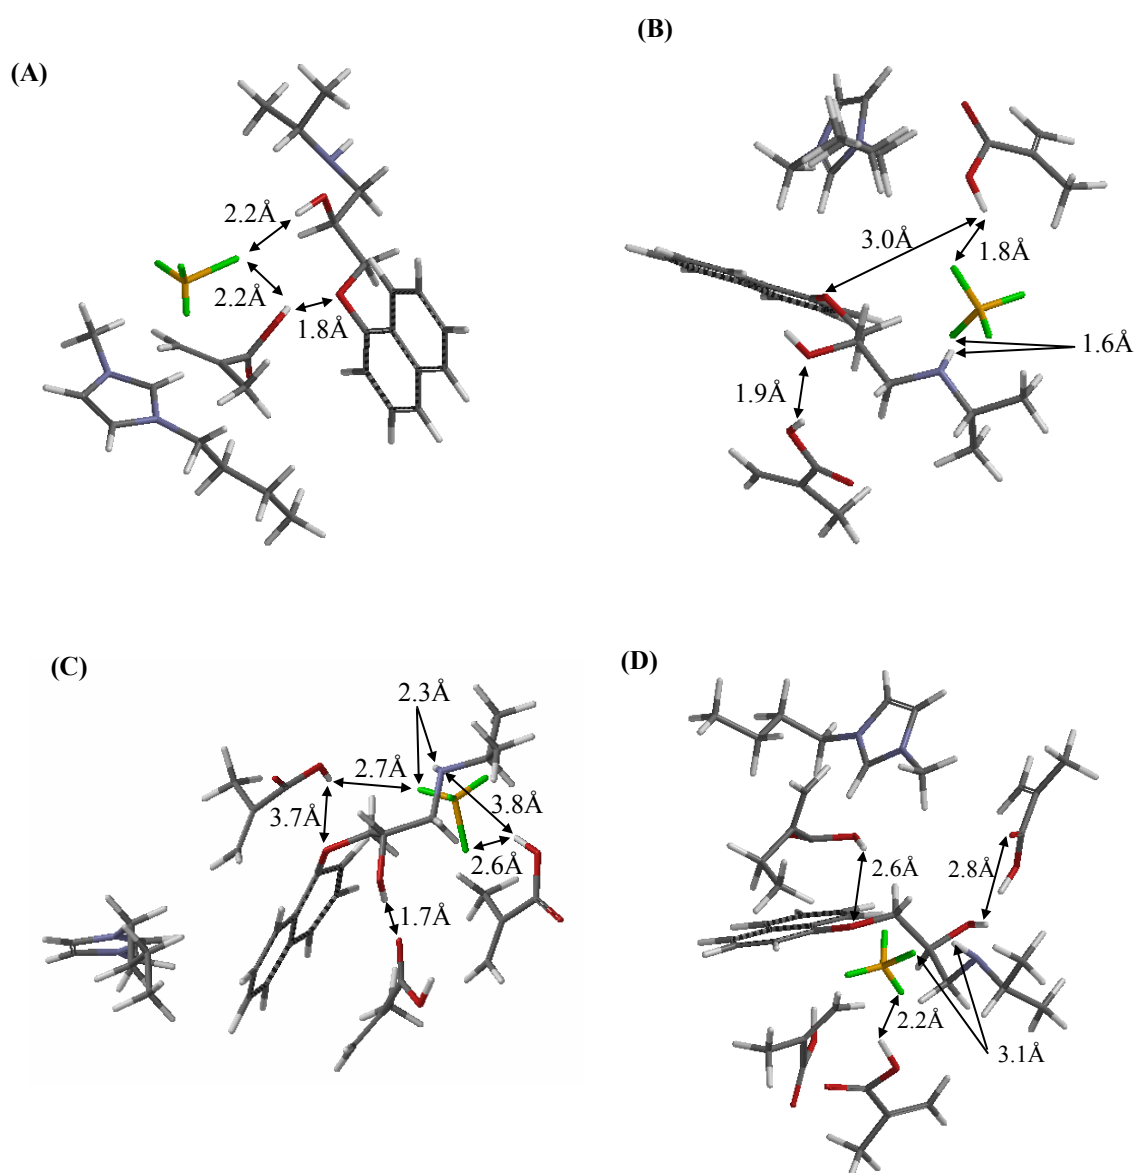

**Figure S3** Modelling images of MAA, **1** and [BMIM][BF<sub>4</sub>]. Template:monomer ratios of (A) 1:1, (B) 1:2, (C) 1:3 and (D) 1:4.

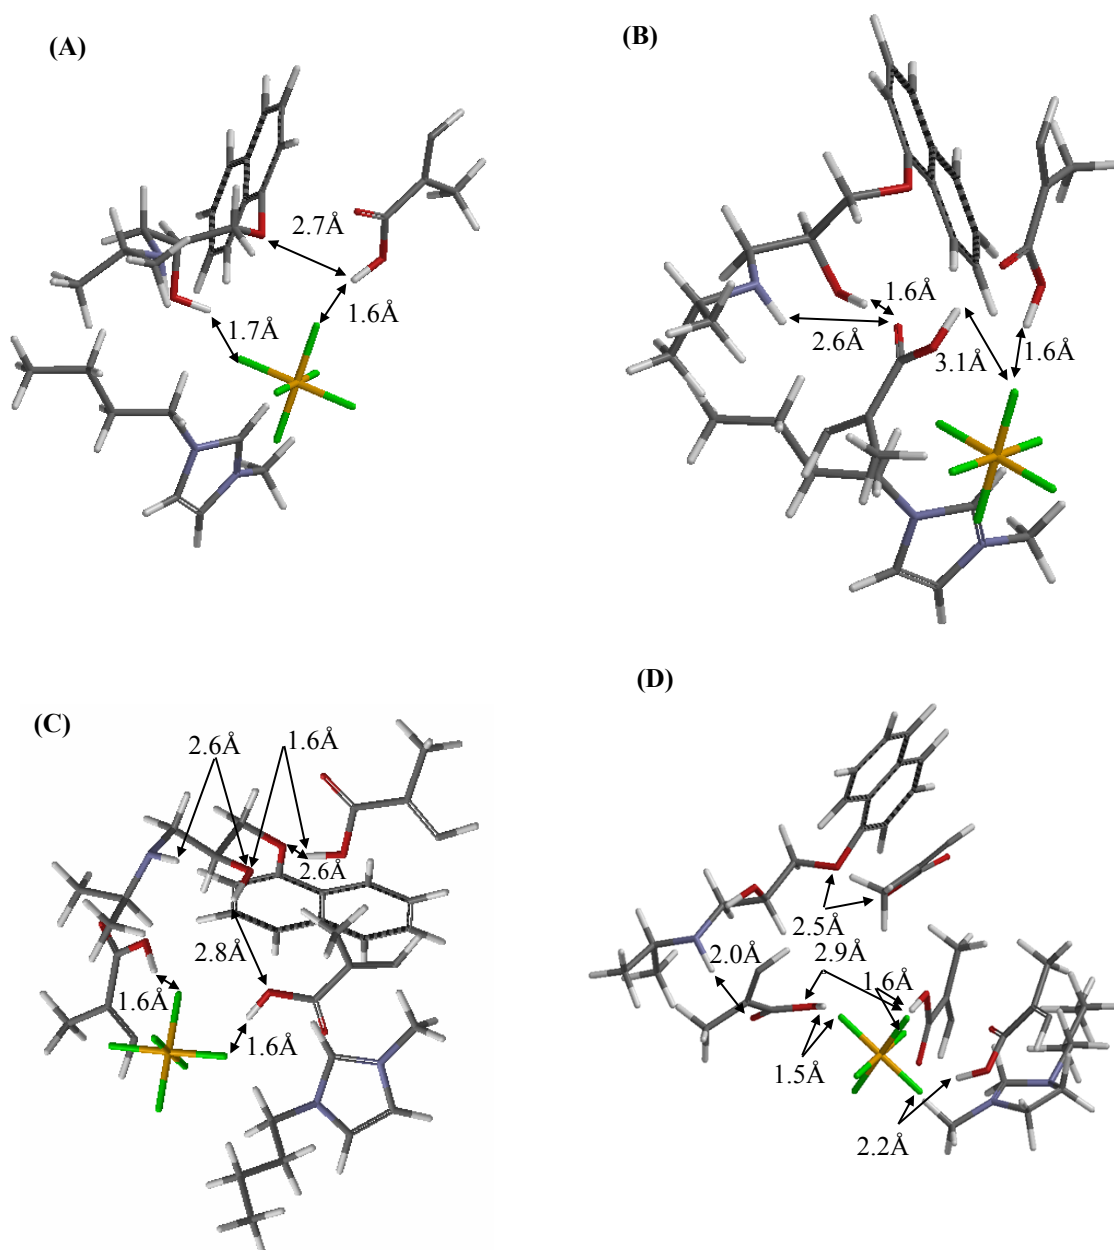

**Figure S4.** Modelling images of MAA, **1** and [BMIM][PF<sub>6</sub>]. Template:monomer ratios of (A) 1:1, (B) 1:2, (C) 1:3 and (D) 1:4.

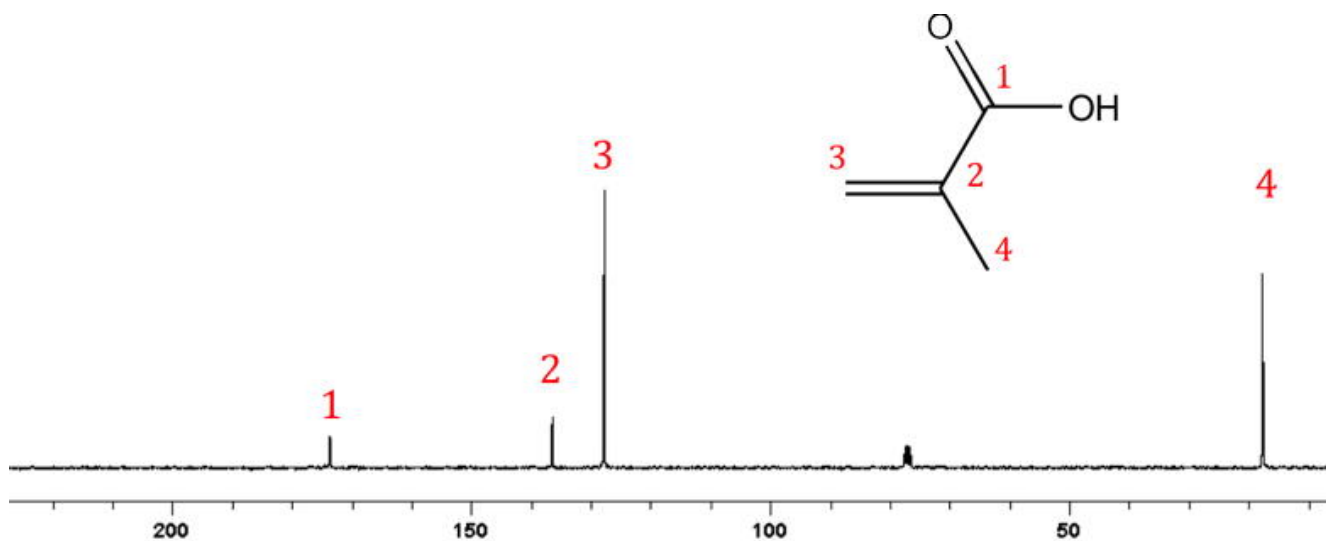

**Figure S5.** MAA structure,  $^{13}\text{C}$  NMR spectrum of MAA in  $\text{CHCl}_3$ , with chemical shifts given in ppm.

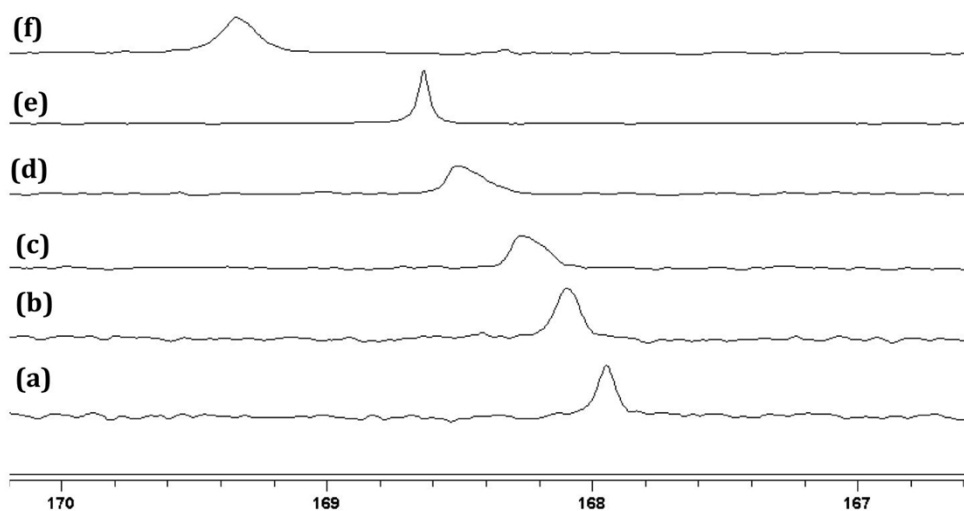

**Figure S6.** C1 movement in a  $^{13}\text{C}$  NMR titration of MAA in 0.5 mL  $[\text{BMIM}][\text{PF}_6]$ . MAA additions of (a) 6  $\mu\text{L}$ , (b) 8  $\mu\text{L}$ , (c) 10  $\mu\text{L}$ , (d) 12  $\mu\text{L}$ , (e) 14  $\mu\text{L}$  and (f) 26  $\mu\text{L}$ . Shifts are in ppm.

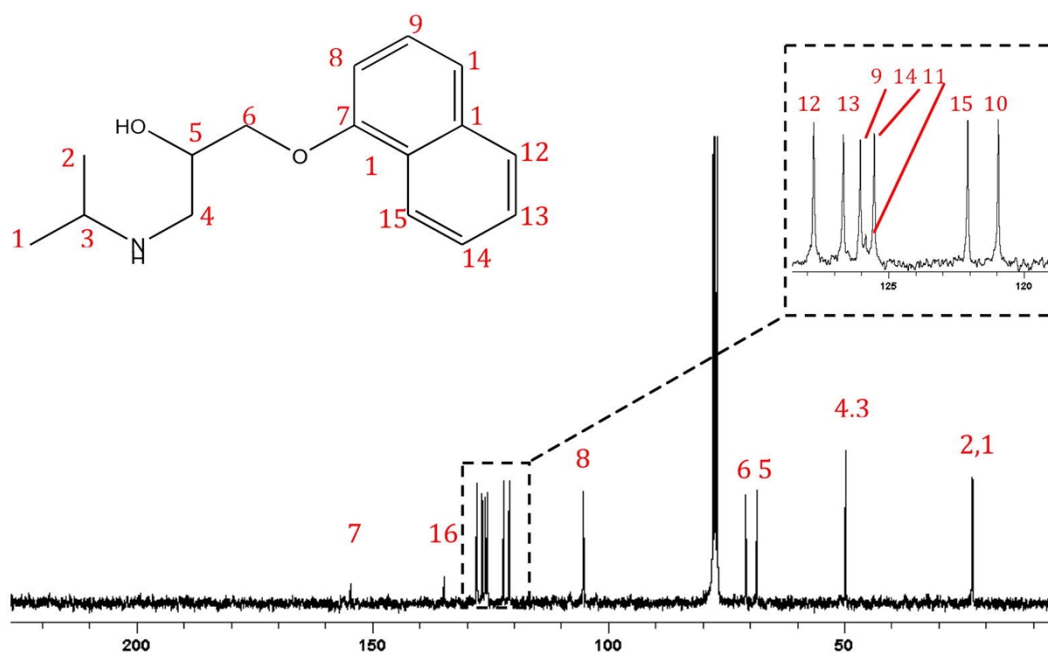

**Figure S7.**  $^{13}\text{C}$  NMR spectrum of **1** with resonance assignments.

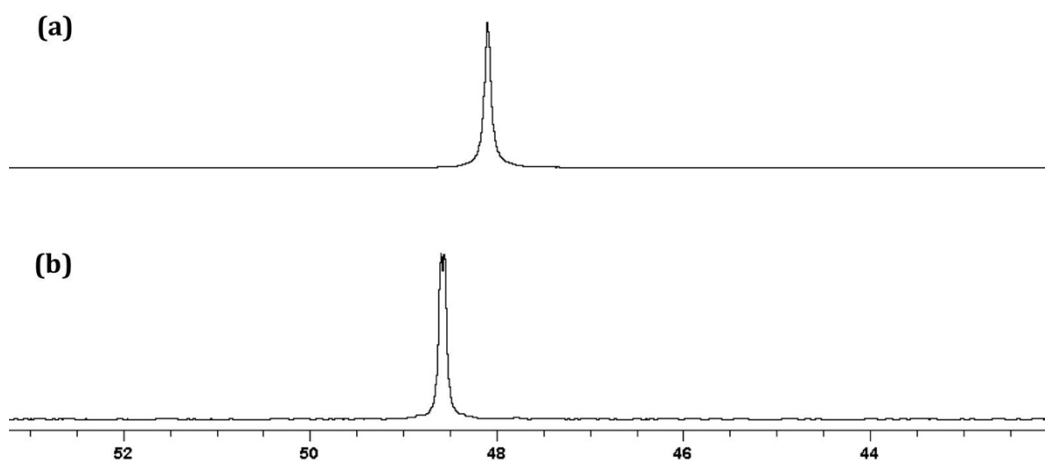

**Figure S8** Partial  $^{13}\text{C}$  NMR spectra of (a) 13 mg **1** in 0.5 mL [BMIM][PF<sub>6</sub>] and (b) 13 mg **1** in CHCl<sub>3</sub> showing the observed C3 shifts in ppm.

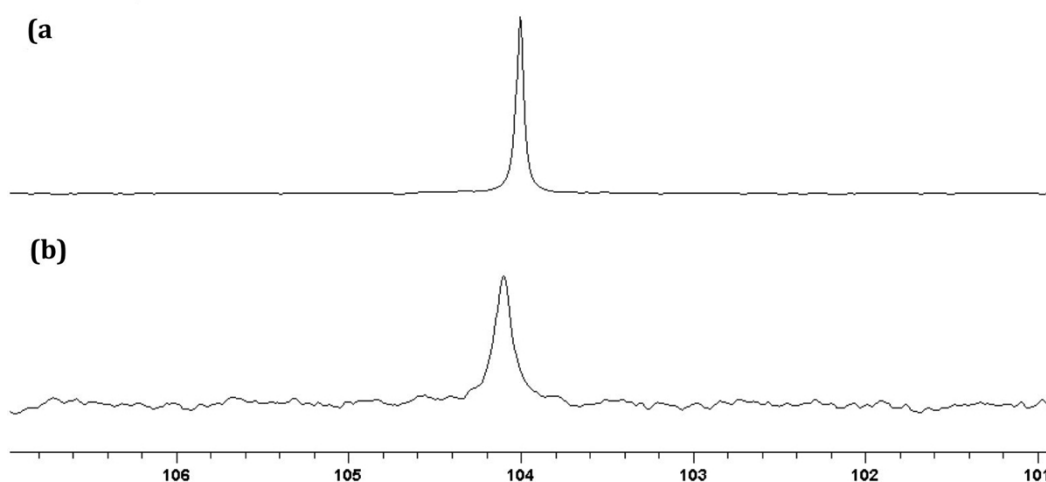

**Figure S9** Partial  $^{13}\text{C}$  NMR spectra of (a) 13mg **1** in 0.5mL [BMIM][PF<sub>6</sub>] and (b) 13 mg **1** in CHCl<sub>3</sub> showing the observed C10 shifts in ppm.

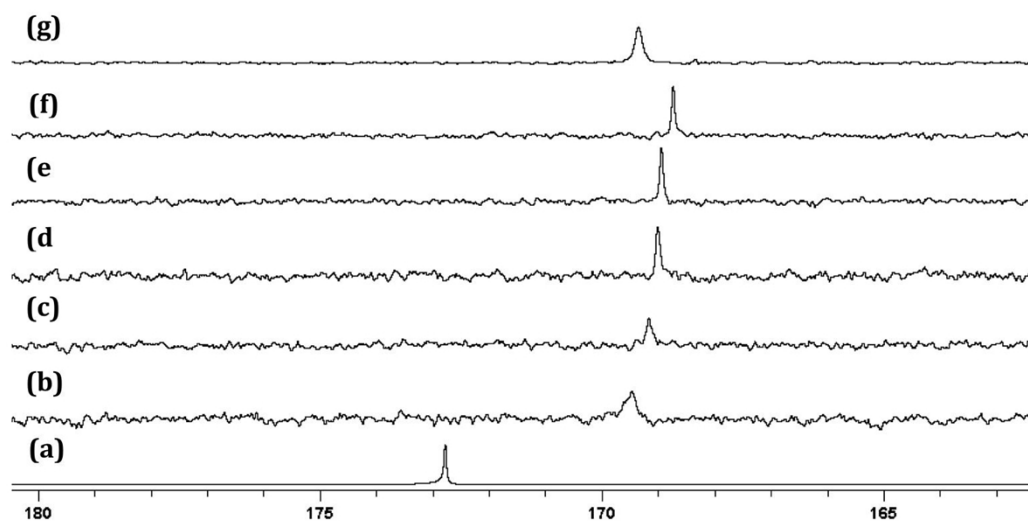

**Figure S10.** Partial  $^{13}\text{C}$  NMR spectra showing C1 resonances of MAA in a titration of MAA with 13 mg **1** in 0.5 mL [BMIM][PF<sub>6</sub>]. (a) MAA, (b-g) 13mg **1** in [BMIM][PF<sub>6</sub>] with MAA additions of (b) 6  $\mu\text{L}$ , (c) 8 $\mu\text{L}$ , (d) 10 $\mu\text{L}$ , (e) 12 $\mu\text{L}$ , (f) 14  $\mu\text{L}$  and (g) 26  $\mu\text{L}$ . Shifts are in ppm.



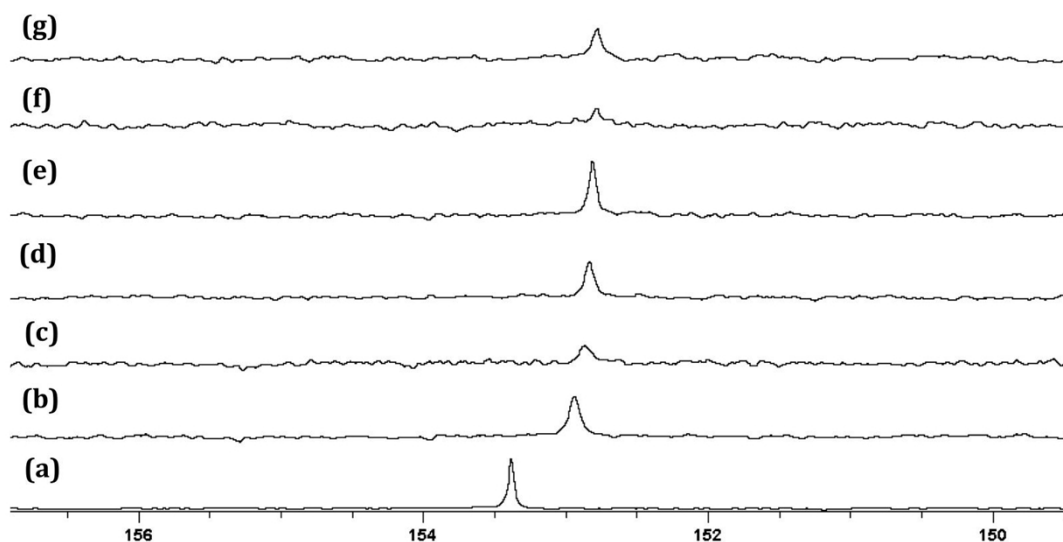

**Figure S11** Partial  $^{13}\text{C}$  NMR spectra showing C7 resonances of **1**. Solution contains 13mg **1** in [BMIM][PF<sub>6</sub>] with MAA additions of (a) 0  $\mu\text{L}$  MAA, (b) 6  $\mu\text{L}$  MAA, (c) 8  $\mu\text{L}$  MAA, (d) 10  $\mu\text{L}$  MAA, (e) 12  $\mu\text{L}$  MAA (f) 14  $\mu\text{L}$  MAA and (g) 26  $\mu\text{L}$  MAA. Shifts are in ppm.

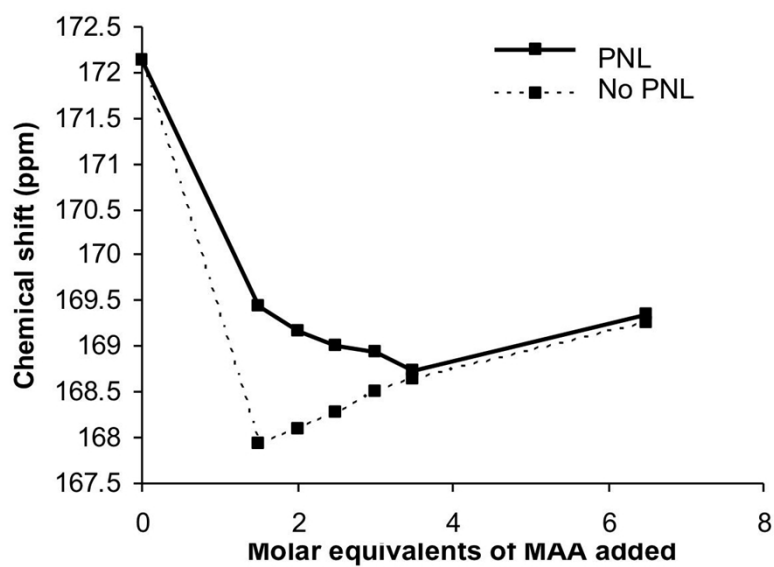

**Figure S12**  $^{13}\text{C}$  NMR shift of MAA C1 upon incremental MAA additions to [BMIM][PF<sub>6</sub>] with and without added **1**.

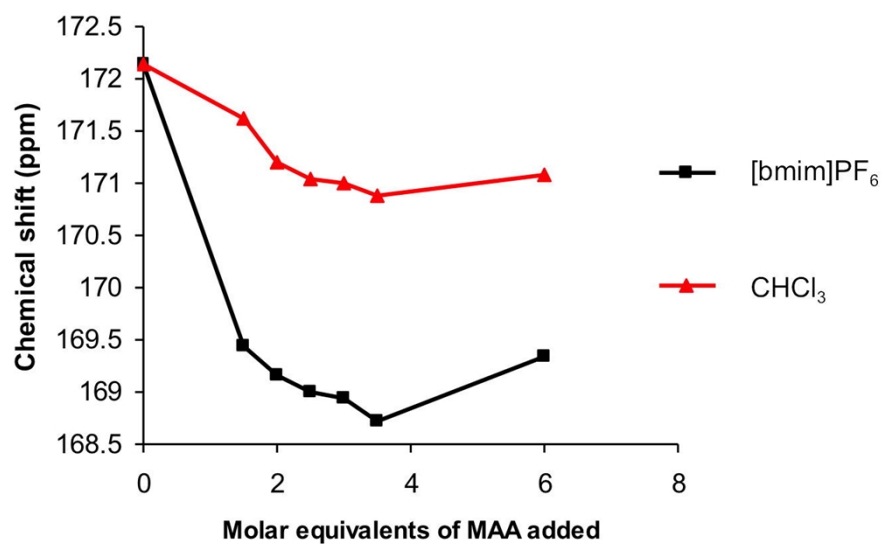

**Figure S13**  $^{13}\text{C}$  NMR shift of C1 of MAA in  $\text{CHCl}_3$  and  $[\text{BMIM}][\text{PF}_6]$  in the presence of added **1**.

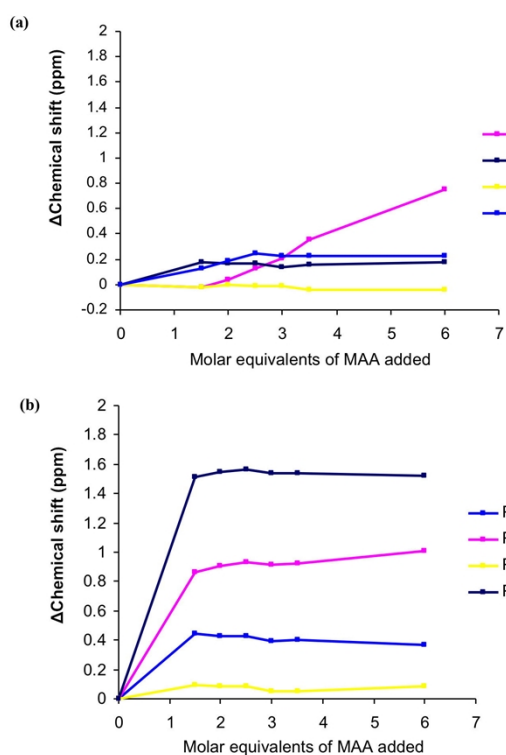

**Figure S14**  $^{13}\text{C}$  shifts of selected **1** carbon atoms in (a)  $[\text{BMIM}][\text{PF}_6]$  and (b)  $\text{CHCl}_3$  upon the incremental additions of MAA.

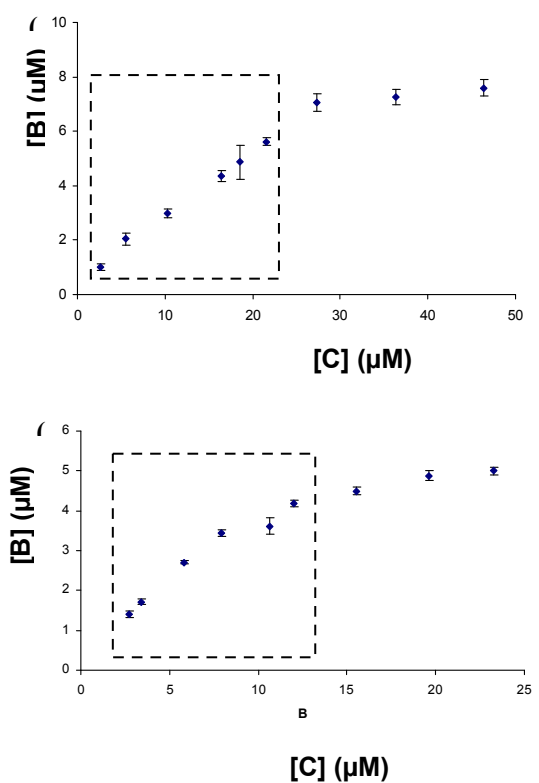

**Figure S15** Saturation binding data for **1**-imprinted MIP prepared in (a) VOC and (b) [BMIM][PF<sub>6</sub>] using 20 mg polymer in **1** solutions of various concentrations over 6 hours. The selected region indicates data used for Scatchard calculations.

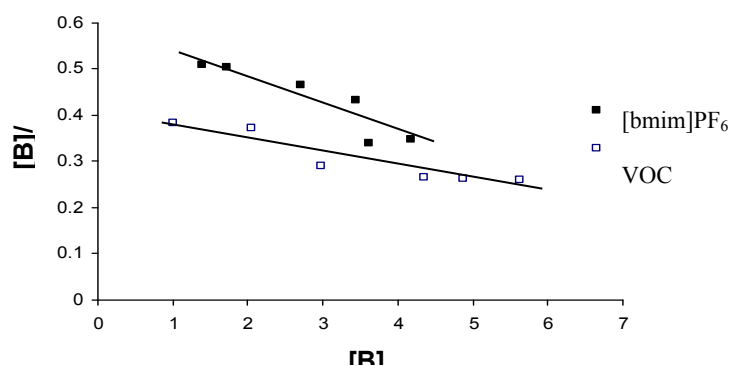

**Figure S16** Scatchard analysis of VOC and [BMIM][PF<sub>6</sub>]-prepared MIP where [B]= **1** bound and [C]= free **1** concentration.

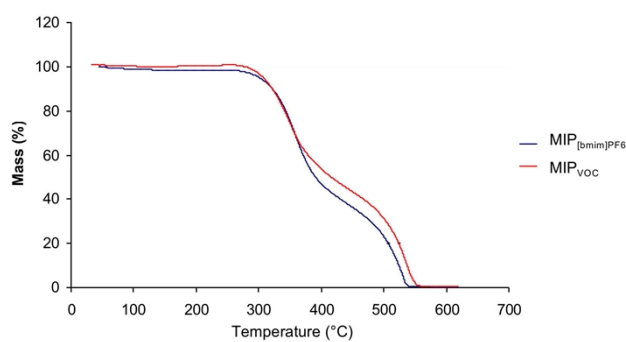

**Figure S17.** TGA traces of **1**-imprinted MIPs.

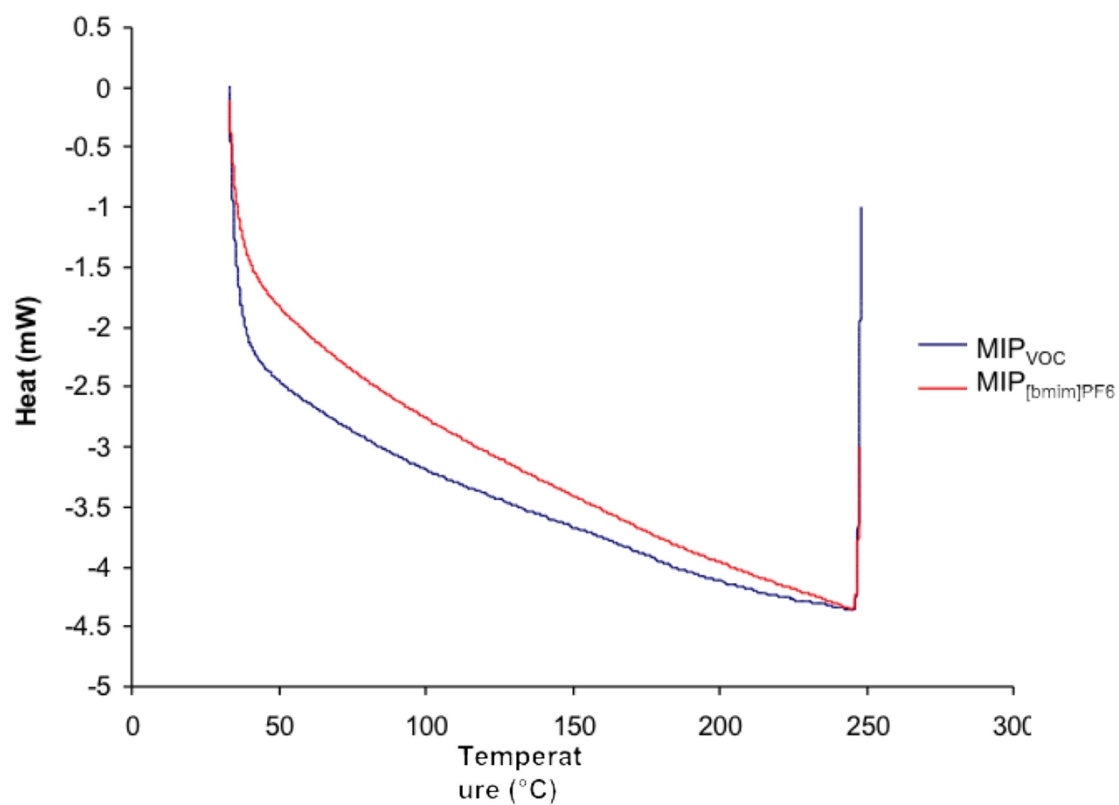

**Figure S18** DSC scans of 1-imprinted MIPs.

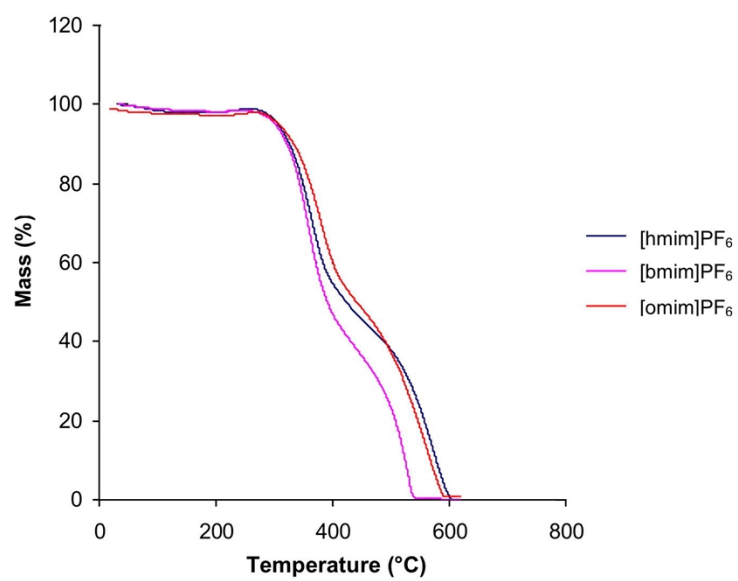

**Figure S19.** TGA traces of [BMIM], [HMIM] and [OMIM][PF<sub>6</sub>]- prepared MIPs
